# Supplementary material for: Study protocol for optimising glycaemic control in type 1 diabetes treated with multiple daily insulin injections: intermittently scanned continuous glucose monitoring, carbohydrate counting with automated bolus calculation, or both? A randomised controlled trial
Source: PubMed Central journal article supplement — BMJ Open. 2020 Apr 27;10(4):e036474. doi: 10.1136/bmjopen-2019-036474 (PMC7213884; doi:10.1136/bmjopen-2019-036474), 2020-04-27
Supplement: bmjopen-2019-036474supp001.pdf [file bmjopen-2019-036474supp001.pdf]

**(S1)****Informeret samtykke til deltagelse i et sundhedsvidenskabeligt forskningsprojekt.**

Forskningsprojektets titel:

Optimizing metabolic control in type 1 diabetes treated with multiple daily insulin injections - flash glucose monitoring, carbohydrate counting with automated bolus calculation, or both?

Dansk:

Forbedring af diabeteskontrollen hos Type 1 diabetes patienter - Flash glukose måling, kulhydrattælling med automatisk bolus-beregning eller begge dele?

**Erklæring fra forsøgspersonen:**

Jeg har fået skriftlig og mundtlig information og jeg ved nok om formål, metode, fordele og ulemper til at sige ja til at deltage.

Jeg ved, at det er frivilligt at deltage, og at jeg altid kan trække mit samtykke tilbage uden at miste mine nuværende eller fremtidige rettigheder til behandling.

Jeg giver samtykke til, at deltage i forskningsprojektet, og har fået en kopi af dette samtykkeark samt en kopi af den skriftlige information om projektet til eget brug.

Forsøgspersonens navn: \_\_\_\_\_

Dato: \_\_\_\_\_ Underskrift: \_\_\_\_\_

Ønsker du at blive informeret om forskningsprojektets resultat samt eventuelle konsekvenser for dig?:

Ja \_\_\_\_\_ (sæt x)      Nej \_\_\_\_\_ (sæt x)

**Erklæring fra den, der afgiver information:**

Jeg erklærer, at forsøgspersonen har modtaget mundtlig og skriftlig information om forsøget.

Efter min overbevisning er der givet tilstrækkelig information til, at der kan træffes beslutning om deltagelse i forsøget.

Navnet på den, der har afgivet information:

Dato: \_\_\_\_\_ Underskrift: \_\_\_\_\_

Projektidentifikation: (ABC/Flash version 1.0)
